# Supplementary material for: Phospholamban spontaneously reconstitutes into giant unilamellar vesicles where it generates a cation selective channel
Source: Royal Society of Chemistry journal article supplement (doi:10.1039/c5cp05893g), 2015-12-03
Supplement: c5cp05893g1.pdf [file c5cp05893g1.pdf]

# Supporting Information for: Phospholamban spontaneously reconstitutes and generates a cation channel in Giant Unilamellar Vesicles

*Serena Smeazzetto<sup>1</sup>, Francesco Tadini<sup>1</sup>, Gerhard Thiel<sup>2</sup>, Debora Berti<sup>3\*</sup>, Costanza Montis<sup>3</sup>*

<sup>1</sup>Department of Chemistry "Ugo Schiff", University of Florence, Firenze, Italy

<sup>2</sup>Plant Membrane Biophysics, TU-Darmstadt, Darmstadt, Germany

<sup>3</sup>Department of Chemistry "Ugo Schiff" and CSGI, University of Florence, Firenze, Italy.

\* email: [debora.berti@unifi.it](mailto:debora.berti@unifi.it); phone: +39 055 457 3038

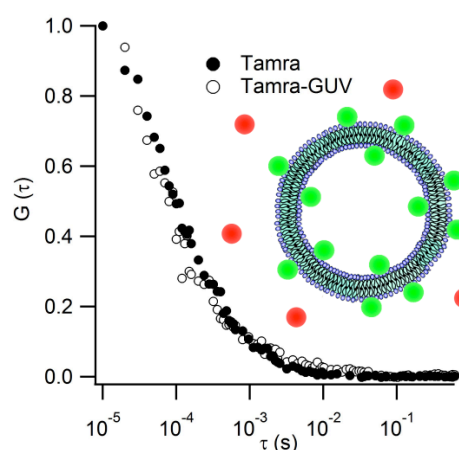

**Figure S1** Representative normalized FCS curves acquired for free Tamra (filled circle) in comparison to those measured for free Tamra incubated with GUVs on top of the vesicles (empty circle). Clearly, the decay rate of the FCS curves are similar, highlighting that the incorporation of the probe in the lipid membrane is very poor.

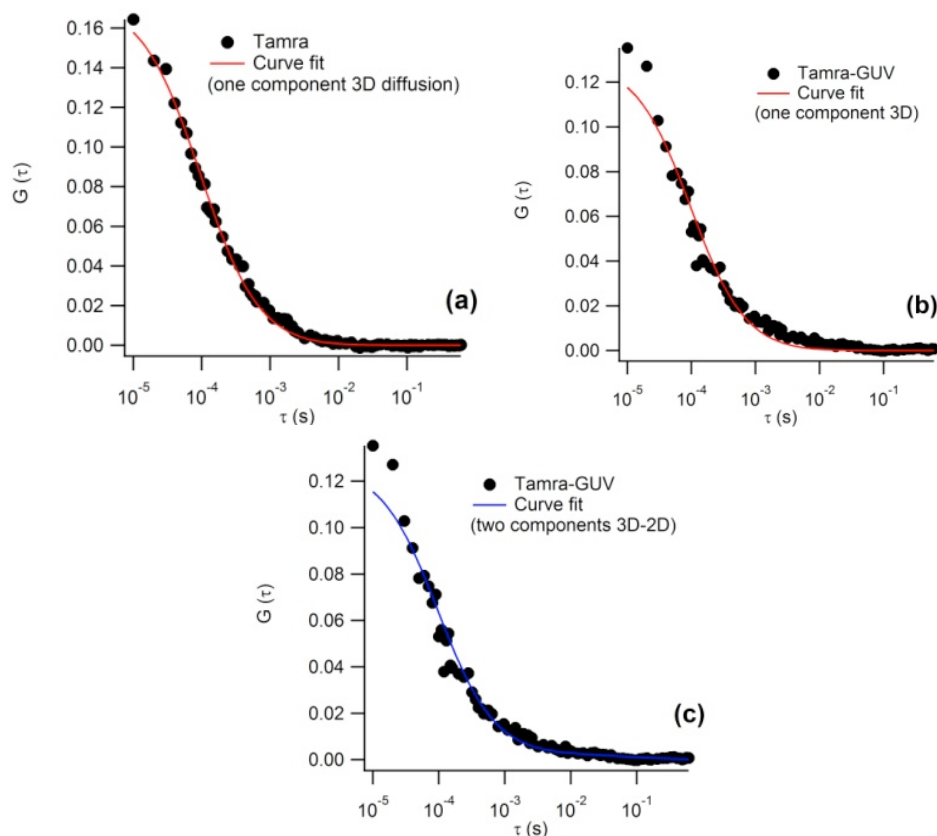

|                  | $D$ ( $\mu\text{m}^2\text{s}^{-1}$ )<br>(1 comp fit) | $D_2$ ( $\mu\text{m}^2\text{s}^{-1}$ )<br>(2comp fit) | $f_2$ |
|------------------|------------------------------------------------------|-------------------------------------------------------|-------|
| <b>Tamra</b>     | $280 \pm 10$                                         | /                                                     | /     |
| <b>Tamra-GUV</b> | $280 \pm 0$                                          | $2 \pm 5$                                             | 2 %   |

**Figure S2** Representative FCS curves acquired for (a) free Tamra and (b, c) Tamra incubated with GUVs (filled circle). Curve fitting according to a (a,b) one component 3D diffusion model (red continuous line, equation 2, main text); (c) 3D-2D two components diffusion model (blue continuous line, equation 3, main text). The overall curve fitting results are reported in the table (d):  $D$  is the value of the 3D diffusion coefficient of the fluorescent probe Tamra (either bare Tamra or Tamra incubated with GUVs) obtained through a one component 3D diffusion model (equation 2, main text);  $D_2$  is the 2D diffusion coefficient of the fluorescent probe Tamra incubated with GUVs, obtained through a two components 3D-2D diffusion model, being the 3D

diffusion coefficient  $D_1$  fixed at  $280 \mu\text{m}^2\text{s}^{-1}$  to improve the robustness of the fitting and  $f_2$  the weight factor of the population undergoing a 2D diffusion with diffusion coefficient  $D_2$ , with respect to the population undergoing a 3D diffusion with diffusion coefficient  $D_1 = 280 \mu\text{m}^2\text{s}^{-1}$ .
